# Supplementary material for: Bacterial endotoxin decreased histone H3 acetylation of bovine mammary epithelial cells and the adverse effect was suppressed by sodium butyrate
Source: PubMed Central journal article supplement (PMC6664593; doi:10.1186/s12917-019-2007-5), 2019-07-29
Supplement: 12917_2019_2007_MOESM5_ESM.pdf [file 12917_2019_2007_MOESM5_ESM.pdf]

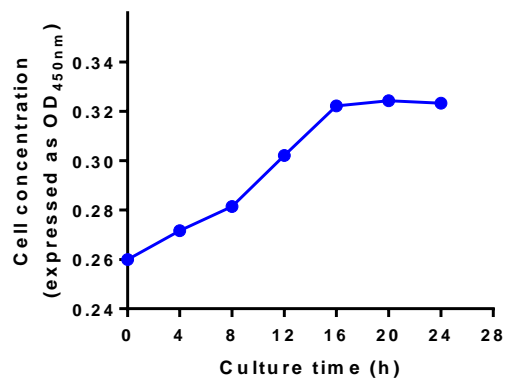

**Fig. S1**
